# Supplementary material for: Effect of new asymmetrical Zn(ii) phthalocyanines on the photovoltaic performance of a dye-sensitized solar cell
Source: Royal Society of Chemistry journal article supplement (doi:10.1039/c9nj02585e), 2019-01-01
Supplement: c9nj02585e1.pdf [file c9nj02585e1.pdf]

# Effect of new asymmetrical Zn(II) phthalocyanines on the photovoltaic performance of dye-sensitized solar cell

## Electronic Supplementary Information

Gülenay Tunç<sup>a</sup>, Emre Güzel<sup>b</sup>, İlkay Şişman<sup>b</sup>, Vefa Ahsen<sup>a</sup>, Gloria Cárdenas-Jirón<sup>\*c</sup>

Ayşe Gül Gürek<sup>\*a</sup>

<sup>a</sup>*Department of Chemistry, Gebze Technical University, 41400 Gebze, Kocaeli, Turkey*

<sup>b</sup>*Department of Chemistry, Sakarya University, 54050 Serdivan, Sakarya, Turkey*

<sup>c</sup>*Laboratory of Theoretical Chemistry, Faculty of Chemistry and Biology, University of Santiago de Chile (USACH), 9170022, Santiago, Chile.*

## Table of Contents

**Figure S1.** MALDI-TOF-MS spectrum of **GT4**.

**Figure S2.** FT-IR spectrum of **GT4**.

**Figure S3.**  $^1\text{H}$ -NMR spectrum of **GT4**.

**Figure S4.**  $^{13}\text{C}$ -NMR spectrum of **GT4**.

**Figure S5.** UV-Vis spectra of **GT4** at the different concentrations in THF.

**Figure S6.** UV-Vis spectra of **GT4** in different solvents.

**Figure S7.** Fluorescence excitation and emission spectra of **GT4**.

**Figure S8.** MALDI-TOF-MS spectrum of **GT6**.

**Figure S9.** FT-IR spectrum of **GT6**.

**Figure S10.**  $^1\text{H}$ -NMR spectrum of **GT6**.

**Figure S11.**  $^{13}\text{C}$ -NMR spectrum of **GT6**.

**Figure S12.** UV-vis spectra of **GT6** at the different concentrations in THF.

**Figure S13.** UV-Vis spectra of **GT6** in different solvents.

**Figure S14.** Fluorescence excitation and emission spectra of **GT6**.

**Figure S15.** Front and side view of the optimized molecular structures of **GT6** and **GT4** isomers calculated at the B3LYP/6-31G(d,p) level of theory.

**Figure S16.** SWV curves of dyes **GT6** and **GT4** on a GCE in TBABF<sub>4</sub>/DMSO.

**Table S1.** Absorption, excitation and emission spectral data for **GT4**, **GT6** in THF.

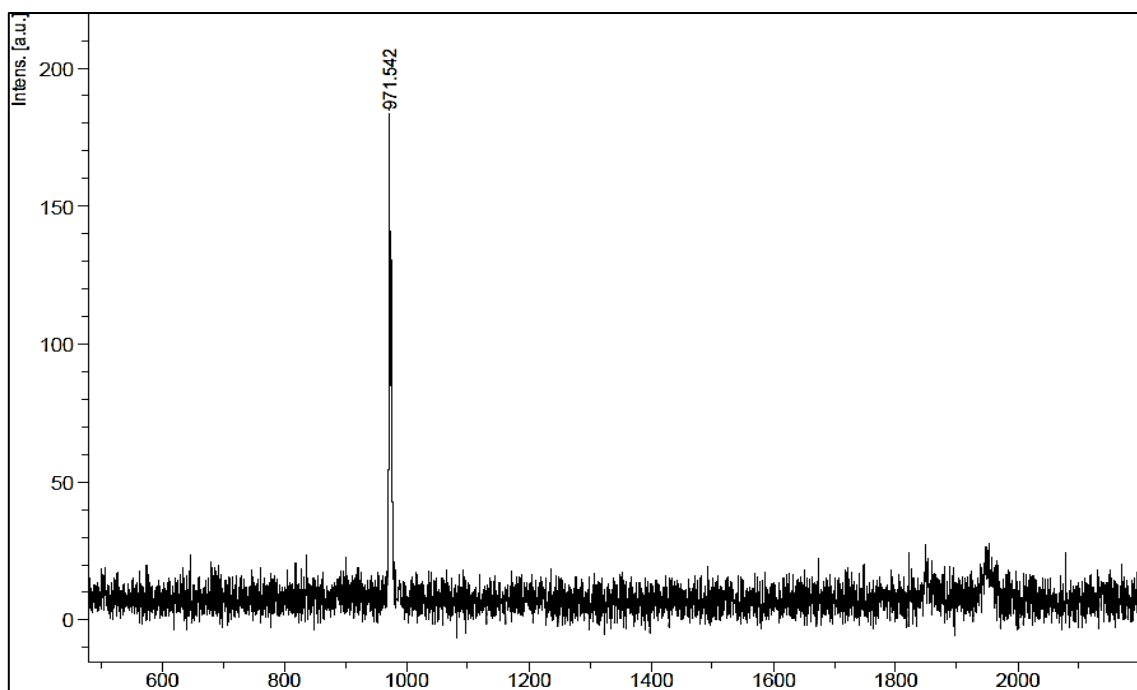

**Figure S1.** MALDI-TOF-MS spectrum of **GT4**.

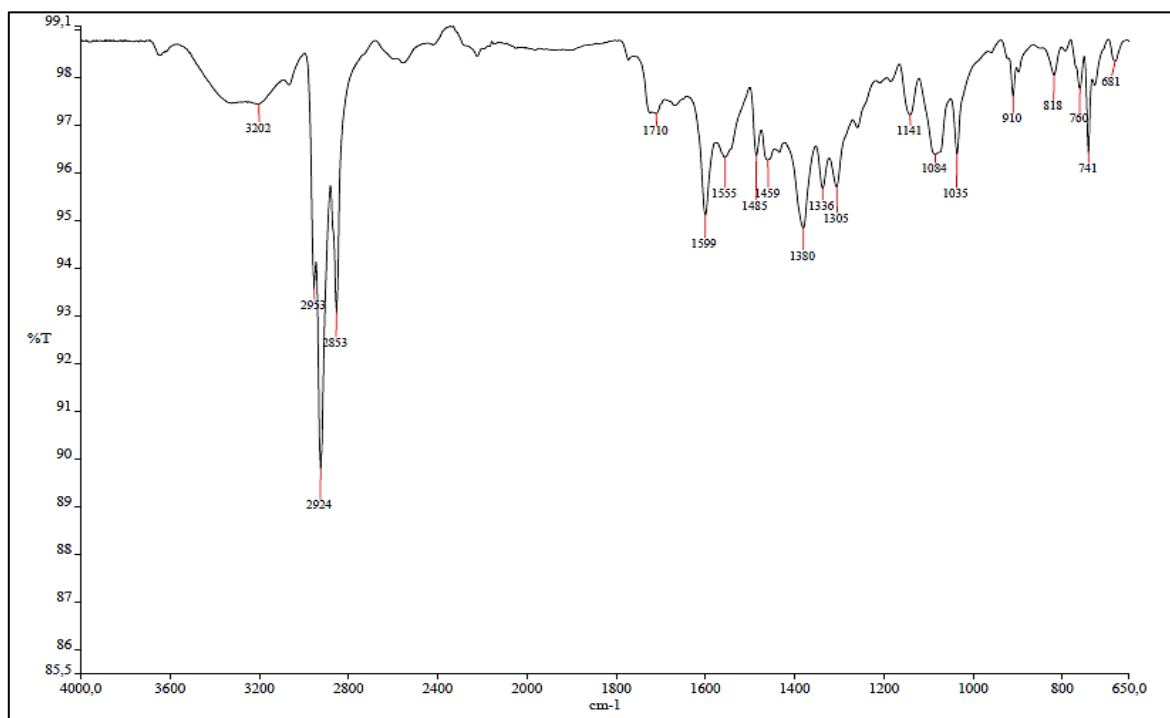

**Figure S2.** FT-IR spectrum of **GT4**.

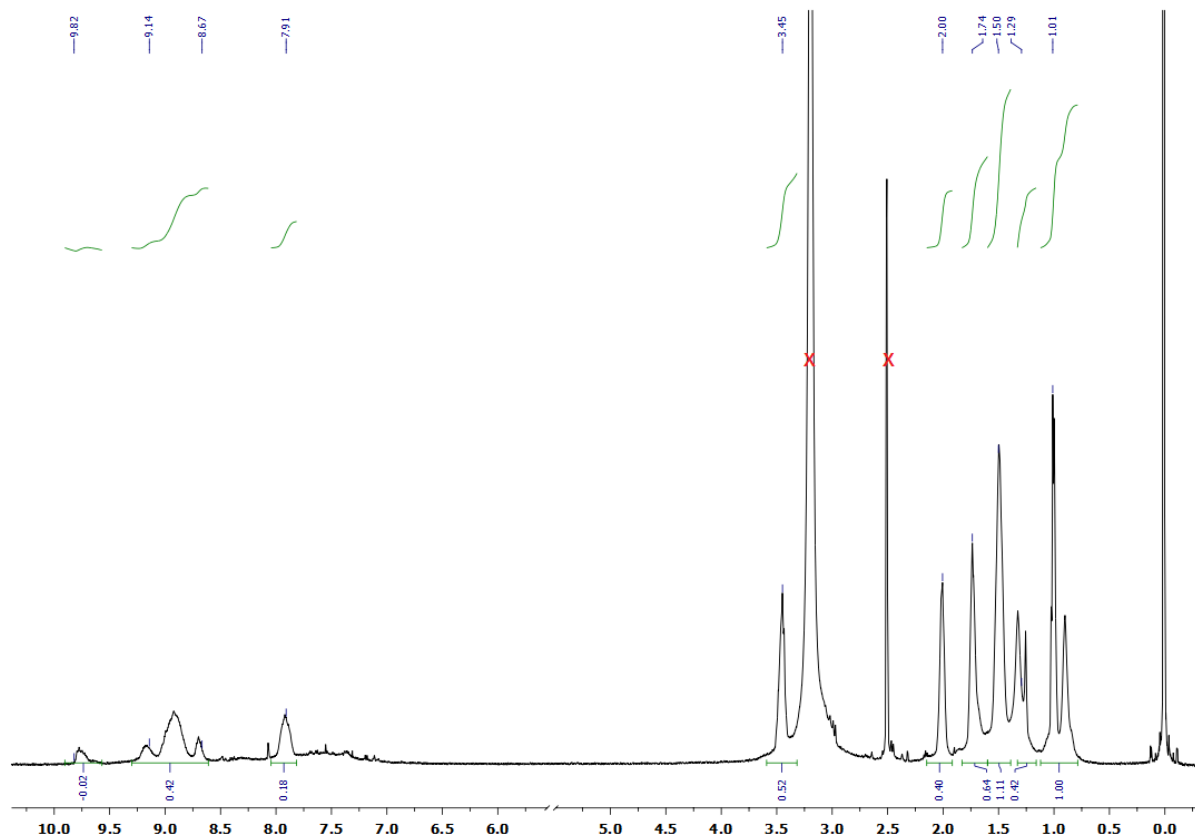

Figure S3.  $^1\text{H}$ -NMR spectrum of GT4.

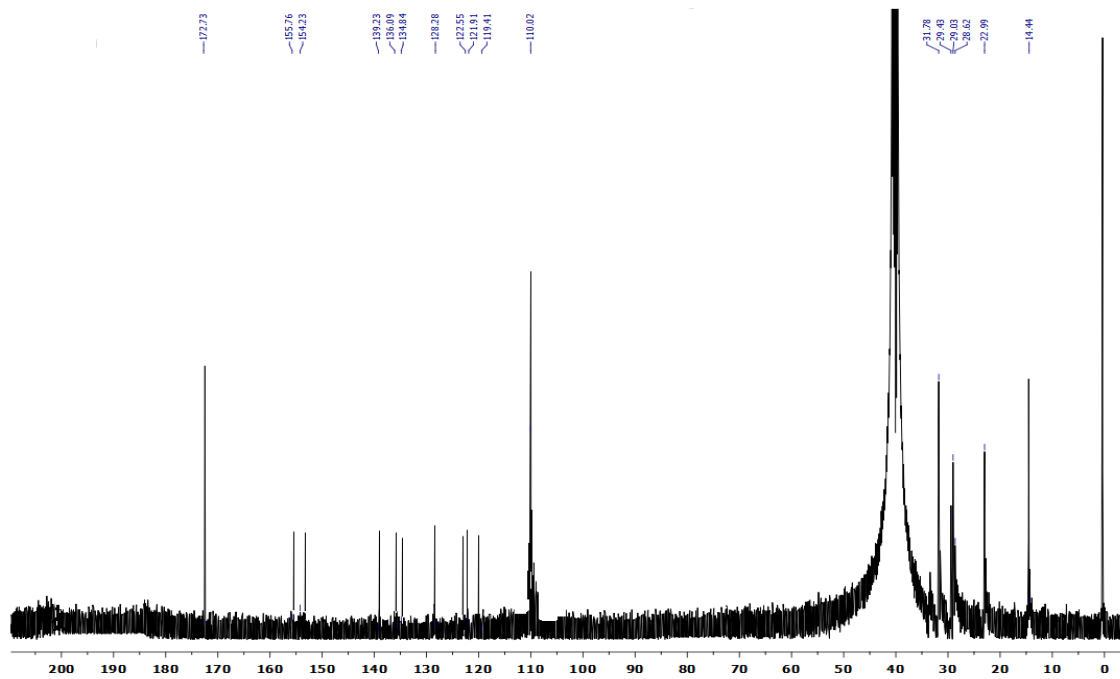

Figure S4.  $^{13}\text{C}$ -NMR spectrum of GT4.

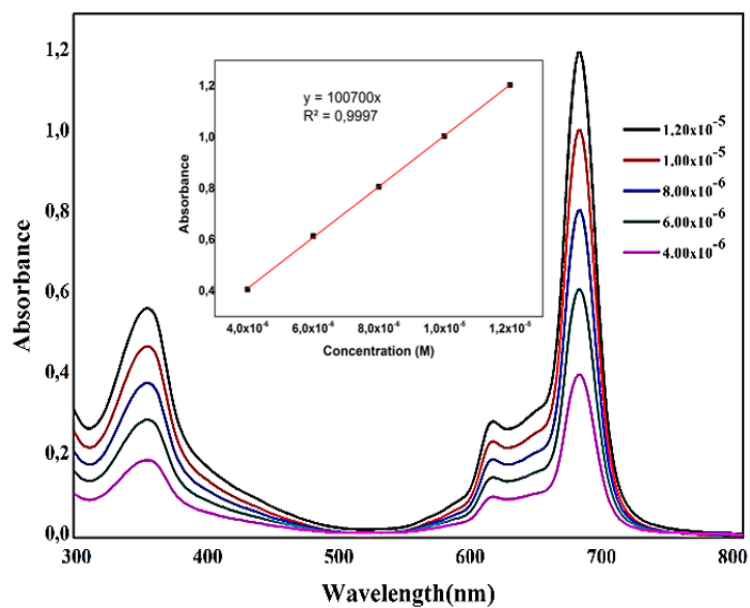

**Figure S5.** UV-Vis spectra of **GT4** at the different concentrations in THF.

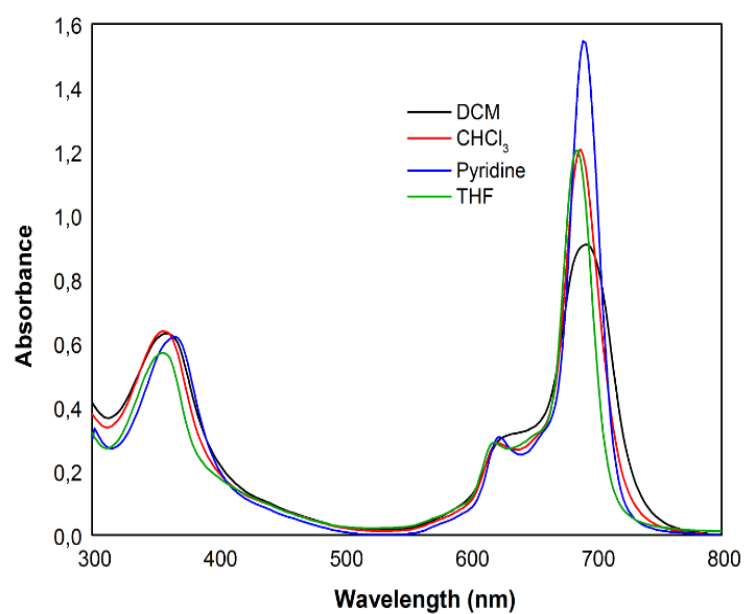

**Figure S6.** UV-Vis spectra of **GT4** in different solvents.

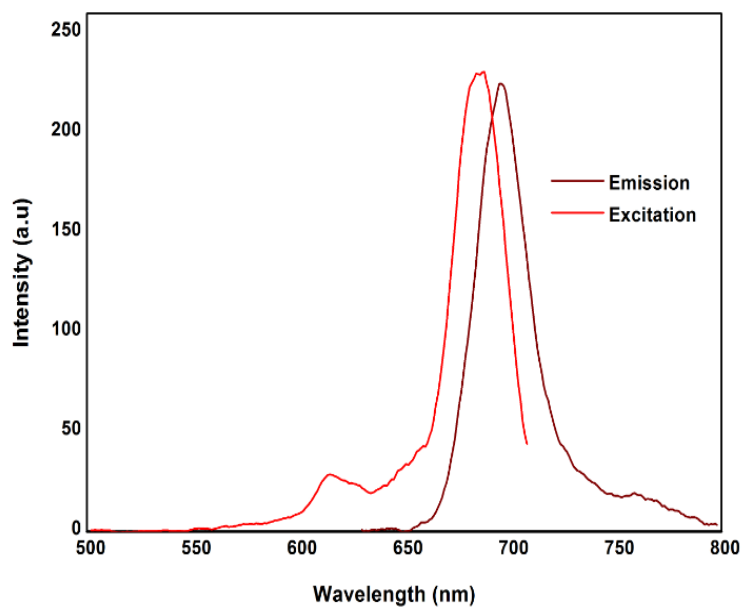

**Figure S7.** Fluorescence excitation and emission spectra of **GT4**.

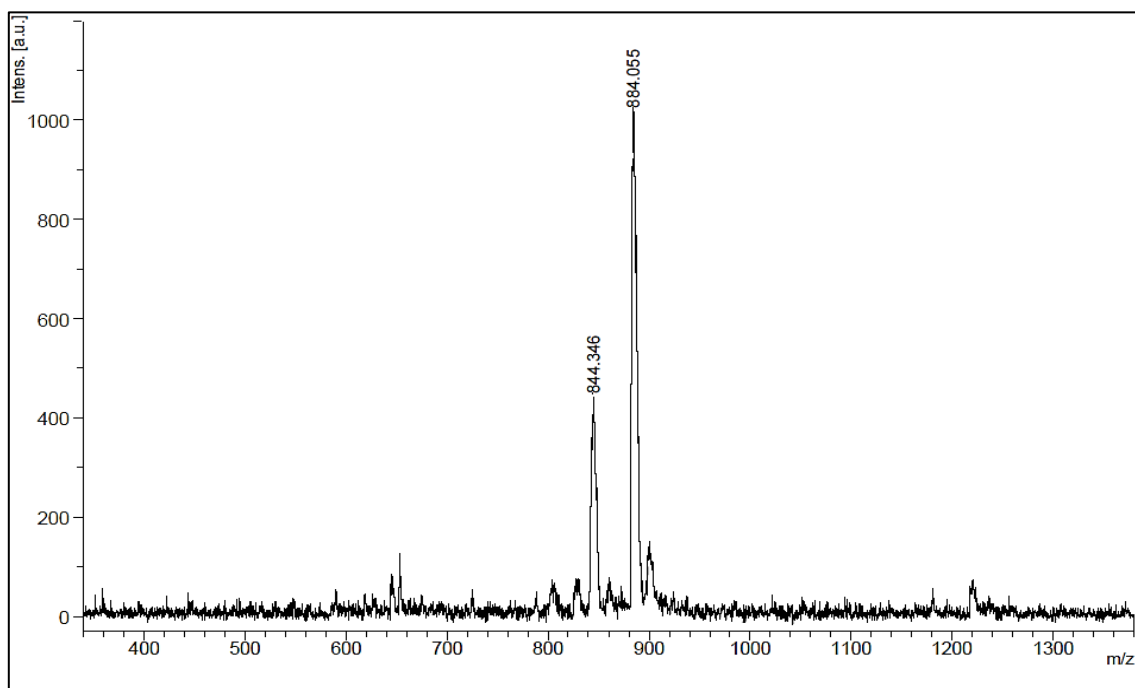

**Figure S8.** MALDI-TOF-MS spectrum of **GT6**.

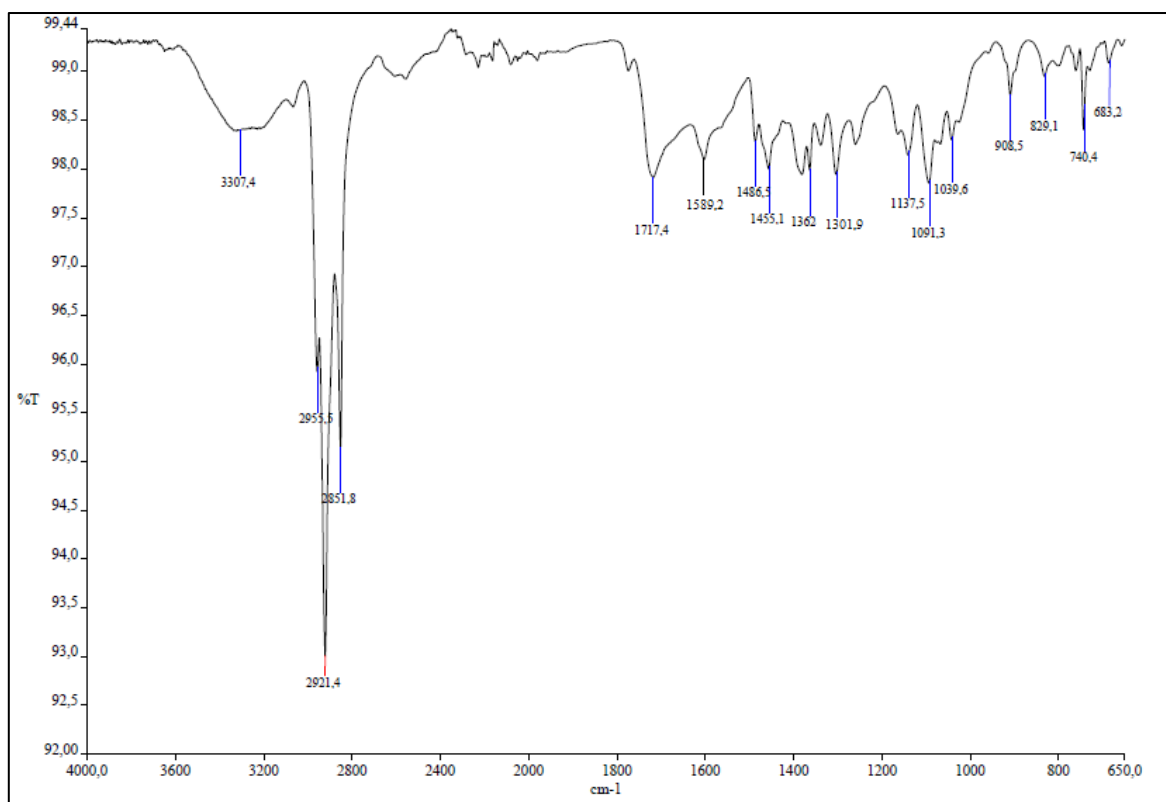

Figure S9. FT-IR spectrum of GT6.

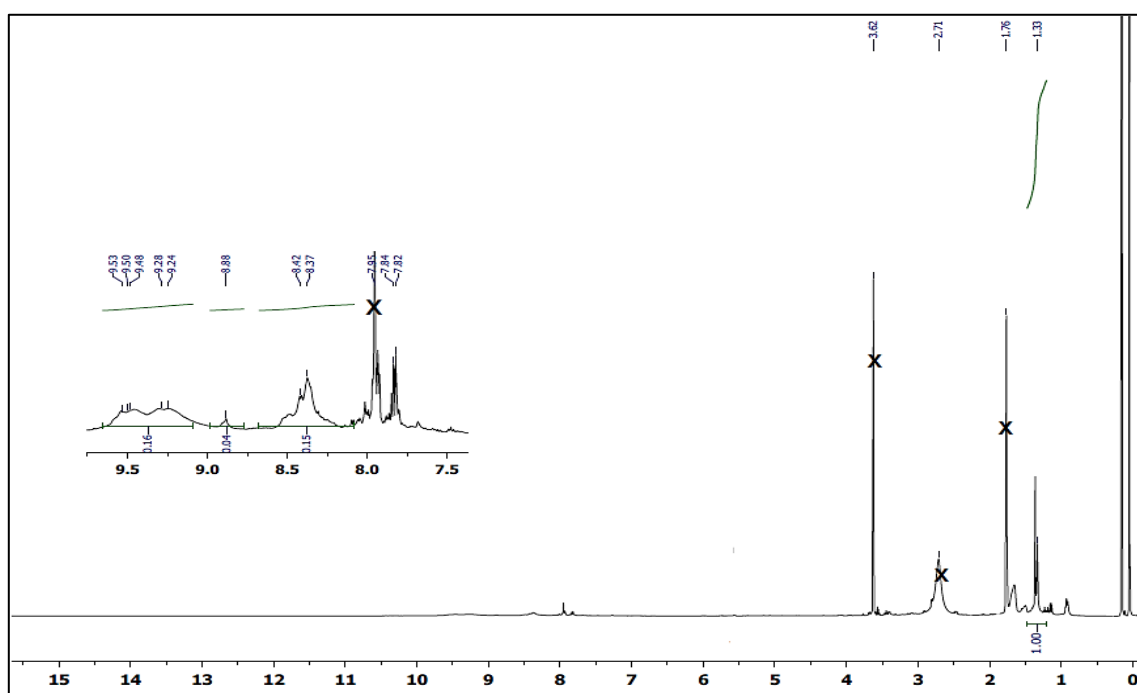

Figure S10. <sup>1</sup>H-NMR spectrum of GT6.

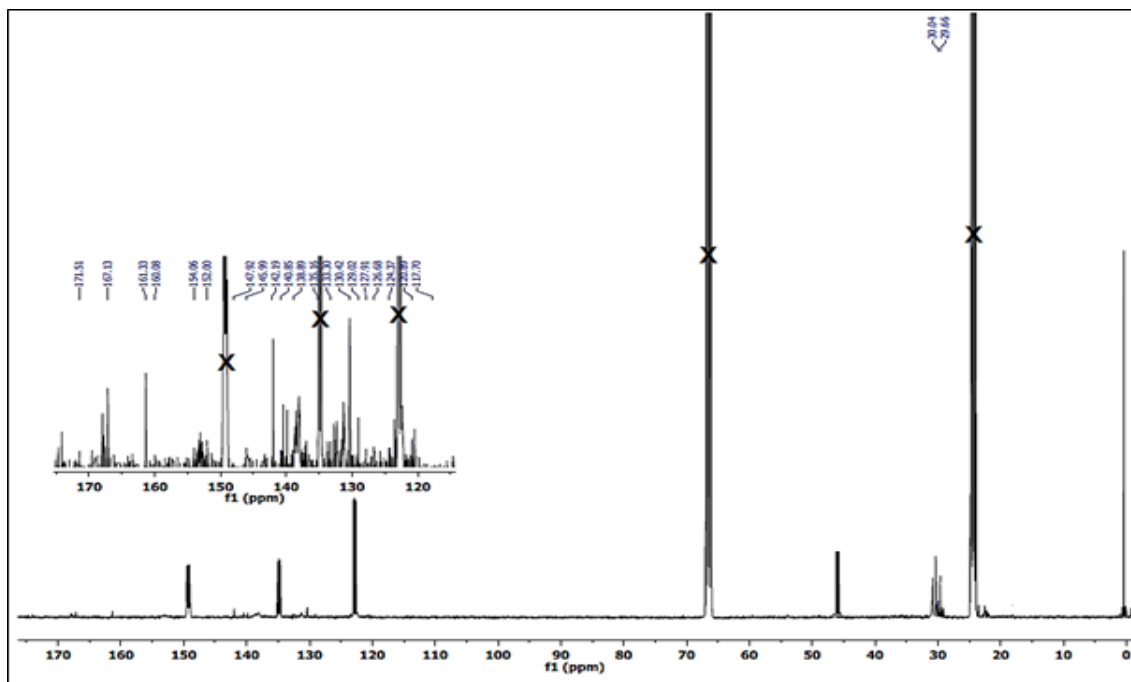

Figure S11.  $^{13}\text{C}$ -NMR spectrum of GT6.

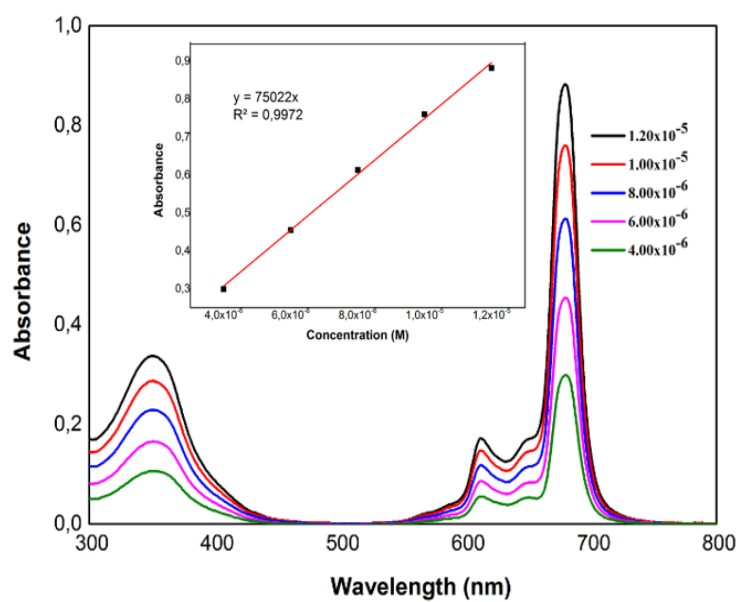

Figure S12. UV-vis spectra of GT6 at the different concentrations in THF.



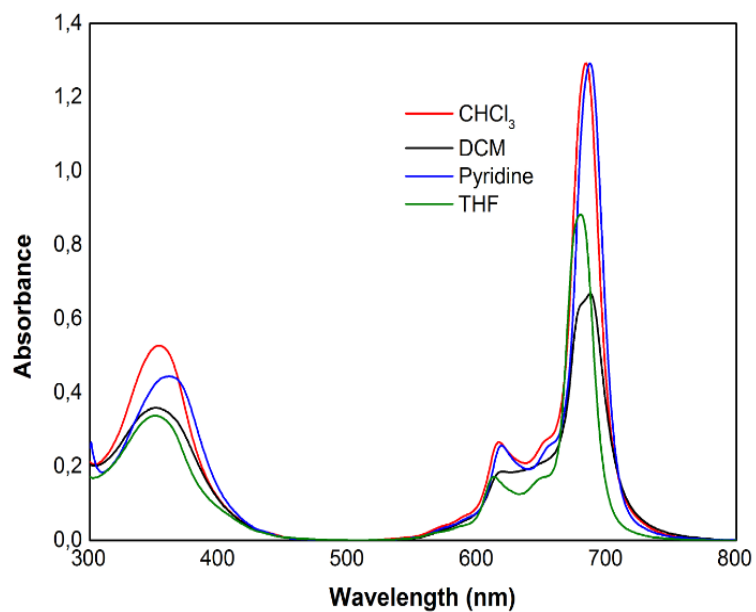

**Figure S13.** UV-Vis spectra of **GT6** in different solvents.

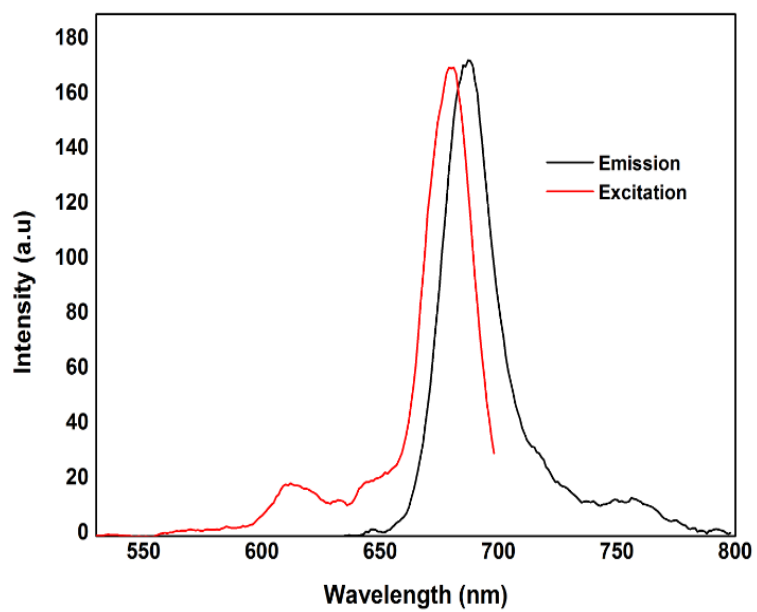

**Figure S14.** Fluorescence excitation and emission spectra of **GT6**.

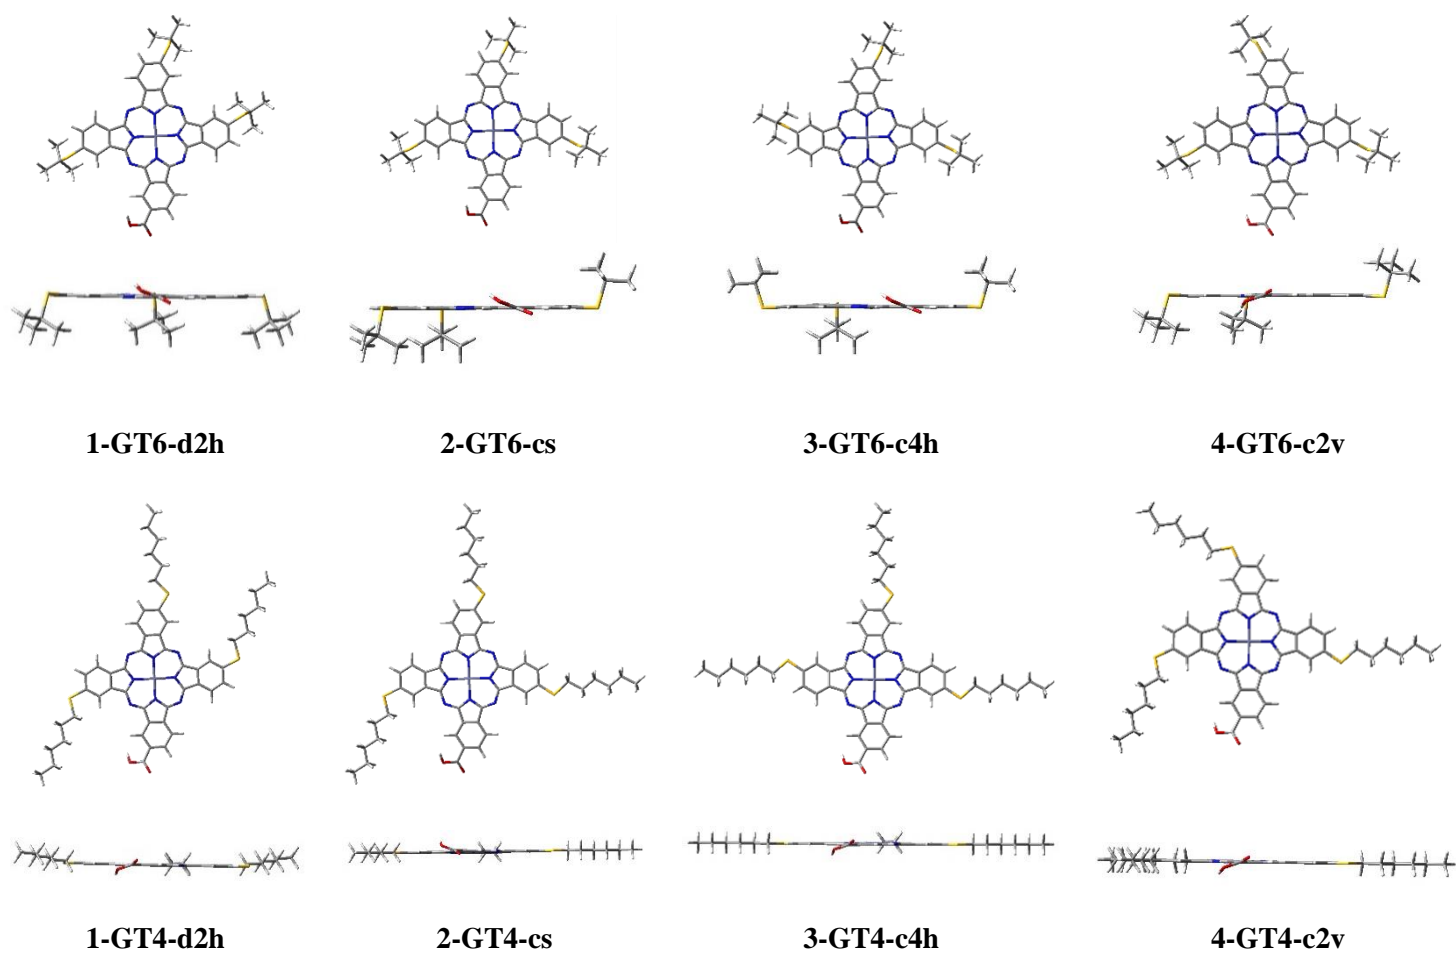

**Figure S15.** Front and side view of the optimized molecular structures of **GT6** and **GT4** isomers calculated at the B3LYP/6-31G(d,p) level of theory.

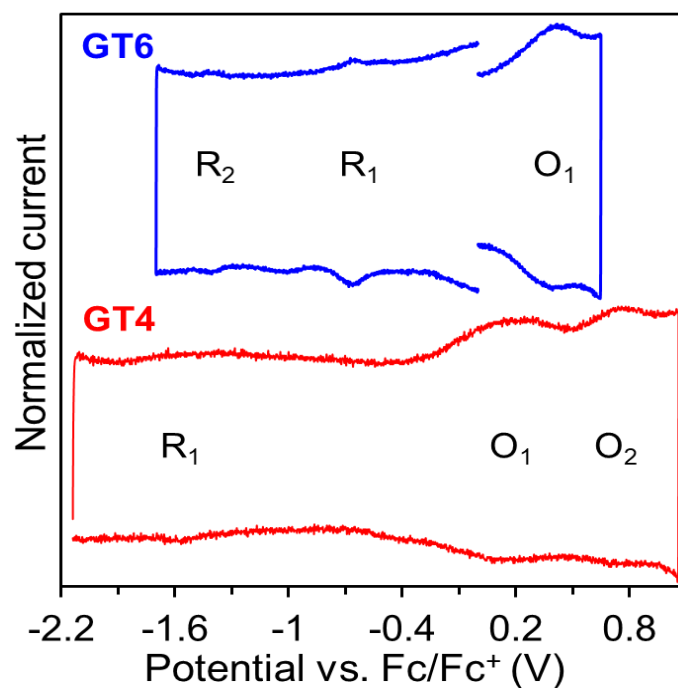

**Figure S16.** SWV curves of dyes **GT6** and **GT4** on a GCE in TBABF<sub>4</sub>/DMSO.

**Table S1.** Absorption, excitation and emission spectral data for **GT4**, **GT6** in THF.

| Compound   | $\lambda_{\max}^{abs}$ (nm) | $\log \epsilon$ | $\lambda_{\max}^{em}$ (nm) | $\lambda_{\max}^{ex}$ (nm) | $\Delta\lambda_{ST}$ (nm) |
|------------|-----------------------------|-----------------|----------------------------|----------------------------|---------------------------|
| <b>GT4</b> | 684                         | 5.00            | 696                        | 688                        | 8                         |
| <b>GT6</b> | 679                         | 4.87            | 687                        | 680                        | 7                         |

Maximum absorption wavelengths ( $\lambda_{\max}$ ), the logarithmic value of extinction coefficients( $\epsilon$ ),  $\lambda_{\max}^{em}$  : maximum emission wavelength,  $\lambda_{\max}^{ex}$  : maximum excitation wavelength and  $\Delta\lambda_{ST}$  : Stoke's shift.
